# Supplementary material for: Illicit Drug Use and Associated Problems in the Nightlife Scene: A Potential Setting for Prevention
Source: MDPI journal article supplement (doi:10.3390/ijerph18094789), 2021-04-30
Supplement: s1 [file s1]

**Table S1. Source of information regarding the survey**

| Event Info                      | Percent |
|---------------------------------|---------|
| Facebook                        | 87.2    |
| Friends                         | 84.5    |
| Word of Mouth                   | 56.8    |
| E-mail list or newsletter       | 42.5    |
| Offline advertising             | 26.7    |
| Other websites                  | 23.9    |
| Resident Advisor                | 16.5    |
| Twitter                         | 3.8     |
| Other                           | 3.3     |
| Pirate or online radio stations | 3.2     |

Participants (n=1371, no missing data) stated where they got information about the survey.

**Table S2. Comparison of demographics and drug use prevalence between participants included and excluded from analysis**

|                       | A) included<br>% (n) | B) excluded<br>% (n) | C) excluded<br>% (n) |
|-----------------------|----------------------|----------------------|----------------------|
| Gender                |                      |                      |                      |
| Male                  | 72.3 (991)           | 72.6 (454)           | 74.2 (743)           |
| Female                | 25.9 (355)           | 25.9 (162)           | 24.0 (240)           |
| Other                 | 1.8 (25)             | 1.4 (9)              | 1.9 (19)             |
| Age in years          |                      |                      |                      |
| Mean $\pm$ SD         | 24.8 $\pm$ 4.5       | 25.4 $\pm$ 5.0       | 24.9 $\pm$ 5.0       |
| Min-max               | 18-34                | 18-51                | 14-51                |
| Illicit drugs ever    | 71.9 (986)           | 83.0 (519)           | -                    |
| Ever use of           |                      |                      |                      |
| Cannabis              | 68.2 (935)           | 79.8 (499)           | -                    |
| Ecstasy               | 47.8 (656)           | 64.8 (405)           | -                    |
| Cocaine               | 37.9 (519)           | 56.3 (352)           | -                    |
| Amphetamine           | 35.4 (485)           | 51.5 (322)           | -                    |
| Use last 12 months of |                      |                      |                      |
| Cannabis              | 51.0 (699)           | 37.0 (231)*          | -                    |
| Ecstasy               | 36.5 (500)           | 25.6 (160)**         | -                    |
| Cocaine               | 27.9 (382)           | 18.2 (114)***        | -                    |
| Amphetamine           | 22.9 (314)           | 13.9 (87)****        | -                    |

**a)** Included in the study were 1371 participants who completed the survey and not indicating use of "spanglers", as well as met the following inclusion criteria: age of 18-34 years and having visited at least six electronic dance music events during the previous 12 months.

**b)** A group excluded from analysis (n=625) due to not completing the survey (n=498), stating the use of "spanglers" (n=4) or not meeting the inclusion criteria (see a, n=123) but still answering relevant questions on drug use. Percentages of internal dropout: \*31.0%, \*\*35.2%, \*\*\*30.2%, \*\*\*\*29.6%.

**c)** remaining group (n=1002) excluded from analysis had not completed the survey and stopped answering the questions before drug use (median time: 4 min). Whereas at earlier questions (e.g. club ever attendance or motive to go out) 302 individuals had not answered (probably stopped the survey), at the question before drug use "events info" (Where they got to know about the survey) 958 people had not answered any of those questions.

**Table S3. Frequency of music styles played at EDM venues attended**

|          | respondents<br>% (n) | Yes (% of<br>respondents (n)) | median (IQ<br>range) |
|----------|----------------------|-------------------------------|----------------------|
| House    | 93.3 (1279)          | 98.5 (1260)                   | 7 (5-8)              |
| Techno   | 86.9 (1191)          | 97.6 (1162)                   | 6 (3-8)              |
| Electro  | 72.9 (999)           | 94.1 (940)                    | 4 (2-7)              |
| Hip-hop  | 67.6 (927)           | 91.3 (846)                    | 4 (2-7)              |
| Trance   | 67.5 (926)           | 99.0 (917)                    | 3 (1-5)              |
| Disco    | 62.4 (856)           | 88.1 (754)                    | 3 (1-5)              |
| Dubstep  | 60.3 (827)           | 84.4 (698)                    | 2 (1-3)              |
| DnB      | 60.3 (827)           | 89.0 (736)                    | 2 (1-4)              |
| RnB      | 60.2 (825)           | 88.4 (729)                    | 4 (1-6)              |
| Goa      | 58.1 (796)           | 86.4 (688)                    | 3 (1-6)              |
| Reggae   | 54.3 (745)           | 85.9 (640)                    | 2 (1-4)              |
| HardD    | 53.0 (727)           | 78.7 (572)                    | 2 (1-4)              |
| IDM      | 47.5 (651)           | 79.1 (515)                    | 2 (1-5)              |
| Hardcore | 45.2 (620)           | 73.4 (455)                    | 1 (0-4)              |
| New Wave | 38.4 (527)           | 67.7 (357)                    | 1 (0-4)              |
| Other    | 49.0 (672)           | 47.3 (318)                    | 0 (0-5)              |

Of 1371 participants. response frequency varied for each music style (left column). Percent of respondents stating that a certain music style was played at the EDM events that they attend. as well as median frequency the music style was played from 0 (never) to 10 (all the time) are displayed. Other genres that participants reported were: Acid. Ambient, Balearic, Breakcor, Commerci, Psy, EBM, Funk, Future B, Hardstyle, Indie, minimal, Pop, Psybient, Progress, Reagaeto, Rock, slow tec, soft house, Synth, Trap, triphop, Industri, etc.

**Table S4. Motives to go out rated for their importance**

| Motives                                | Not<br>important | Not very<br>important | Slightly<br>important | Very<br>important |
|----------------------------------------|------------------|-----------------------|-----------------------|-------------------|
| To have fun                            | 0.1              | 0.7                   | 9.3                   | 89.8              |
| To listen to music                     | 0.4              | 2.6                   | 19.9                  | 77.1              |
| To dance                               | 2.5              | 9.8                   | 27.6                  | 60.1              |
| My friends are going                   | 3.2              | 17.4                  | 44.8                  | 34.6              |
| To see a particular artist or<br>event | 4.2              | 16.4                  | 46.4                  | 33.0              |
| To seek excitement                     | 15.4             | 27.3                  | 39.6                  | 17.7              |
| To open up to my friends               | 23.2             | 28.3                  | 34.1                  | 14.4              |
| To explore my mind                     | 24.9             | 36.3                  | 24.4                  | 14.4              |
| To escape my daily life                | 24.4             | 27.9                  | 34.1                  | 13.6              |
| To meet new people                     | 10.9             | 40.5                  | 38.1                  | 10.5              |
| To drink alcohol                       | 21.7             | 33.0                  | 35.2                  | 10.1              |
| To cope with my problems               | 37.6             | 29.5                  | 25.0                  | 8.0               |
| To look for sex                        | 61.1             | 29.0                  | 8.8                   | 1.2               |
| To take drugs                          | 57.0             | 28.2                  | 13.1                  | 1.6               |
| To look for a partner                  | 67.2             | 26.1                  | 6.1                   | 0.6               |

Participants (n=1371, no missing data) rated the importance of different motives to go out.

**Table S5. Venues attended during life-time, the past 12 months, as well as age of onset**

| Venue            | Ever<br>% (n) | 12 months<br>% (n) | ≥ monthly<br>% (n) | Age first<br>median |
|------------------|---------------|--------------------|--------------------|---------------------|
| Club             | 96.2 (1319)   | 95.3 (1307)        | 67.0 (918)         | 18                  |
| Legal festival   | 95.3 (1306)   | 89.9 (1232)        | 16.3 (224)         | 18                  |
| House party      | 93.8 (1286)   | 91.2 (1250)        | 46.2 (633)         | 15                  |
| Pub              | 92.2 (1264)   | 91.4 (1253)        | 73.1 (1002)        | 18                  |
| Illegal festival | 67.7 (928)    | 57.5 (789)         | 22.0 (302)         | 20                  |

Participants stated which types of venues they had attended during their life-time and during the past 12 months. There was no missing data for "ever"-attendance. The remaining questions were only shown to participants who had stated "ever-attendance". Percentages are given of all participants (n=1371). From the question of how frequently these venues were attended during the last 12 months, participants who stated at least monthly attendance (or more often) are presented. A house party refers to a private party at someone's home (not the music style).
